# Supplementary material
Source: HighWire-hosted journal article supplement (https://www.jneurosci.org/highwire/filestream/599627/field_highwire_adjunct_files/8/Table_S2.pdf)
Supplement: Table_S2.pdf [file Table_S2.pdf]

| Constructs         | MO EC50 ( $\mu$ M) | Maximal Response<br>(normalized to WT)            |
|--------------------|--------------------|---------------------------------------------------|
| mTRPA1(wt)         | 7.67 $\pm$ 1.52    | 1                                                 |
| mTRPA1-hTM1-6      | 4.74 $\pm$ 0.70    | 1.26 $\pm$ 0.06                                   |
| mTRPA1-hTM5-6      | 4.15 $\pm$ 1.1     | 0.75 $\pm$ 0.01                                   |
| mTRPA1-dTM5        | 4.20 $\pm$ 0.65    | 1.83 $\pm$ 0.12                                   |
| mTRPA1-S876V/T877L | 20.63 $\pm$ 1.18   | 0.93 $\pm$ 0.10                                   |
| hTRPA1(wt)         | 2.33 $\pm$ 0.74    | 1                                                 |
| hTRPA1-mTM1-6      | 4.67 $\pm$ 3.47    | 0.83 $\pm$ 0.11                                   |
| hTRPA1-mTM5-6      | 7.06 $\pm$ 4.34    | 1.01 $\pm$ 0.07                                   |
| hTRPA1-V875G       | 1.51 $\pm$ 0.24    | 0.82 $\pm$ 0.02                                   |
| hTRPA1-FGFATLIAM   | 2.98 $\pm$ 0.50    | 0.94 $\pm$ 0.02                                   |
| hTRPA1-dTM5        | 1.32 $\pm$ 0.46    | 0.72 $\pm$ 0.01                                   |
| hTRPA1-dTM5a       | 0.85 $\pm$ 0.10    | 0.53 $\pm$ 0.01                                   |
| hTRPA1-S873V/T874L | 0.98 $\pm$ 0.24    | 0.71 $\pm$ 0.00                                   |
| Fugu-TRPA1(wt)     | 51.5 $\pm$ 9.4     | 1                                                 |
| Mosquito-TRPA1(wt) | 70.7 $\pm$ 12.4    | 1                                                 |
| dTRPA1(wt)         | No activation      |                                                   |
| dTRPA1-mN          | 103.2 $\pm$ 26.5   | 0.84 $\pm$ 0.06<br>(normalized to<br>mTRPA1 (wt)) |
